# Supplementary material for: Metallic cavity nanolasers at the visible wavelength based on in situ solution-grown Au-coated perovskite nanowires
Source: Royal Society of Chemistry journal article supplement (doi:10.1039/d1tc04064b), 2021-12-02
Supplement: d1tc04064b1.pdf [file d1tc04064b1.pdf]

## Supplementary Information for

### **Metallic Cavity Nanolasers at the Visible Wavelength Based on In Situ Solution Grown Au-coated Perovskite Nanowires†**

Xiaohao Jia,<sup>†a,b</sup> Jian Wang,<sup>†c,d</sup> Zhitao Huang,<sup>a,b</sup> Kaiwen Chu,<sup>a,b</sup> Kuankuan Ren,<sup>e</sup> Mingfei Sun,<sup>a,b</sup> Zhijie Wang,<sup>\*a,b</sup> Peng Jin,<sup>\*c,d</sup> Kong Liu,<sup>a,b</sup> and Shengchun Qu<sup>\*a,b</sup>

<sup>a</sup>. Key Laboratory of Semiconductor Materials Science and Beijing Key Laboratory of Low Dimensional Semiconductor Materials and Devices, Institute of Semiconductors, Chinese Academy of Science, Beijing, 100083, China.

<sup>b</sup>. Center of Materials Science and Optoelectronics Engineering, University of Chinese Academy of Sciences, Beijing, 100049, China.

<sup>c</sup>. School of Instrumentation Science and Engineering, Harbin Institute of Technology, Harbin 150001, China.

<sup>d</sup>. Key Laboratory of Micro-systems and Micro-structures Manufacturing (Harbin Institute of Technology), Ministry of Education, Harbin 150080, China.

<sup>e</sup>. School of Mathematical Information, Shaoxing University, Shaoxing, 312000, China.

## Section 1: The reaction mechanism of Au-CH<sub>3</sub>NH<sub>3</sub>PbBr<sub>3</sub> nanowires.

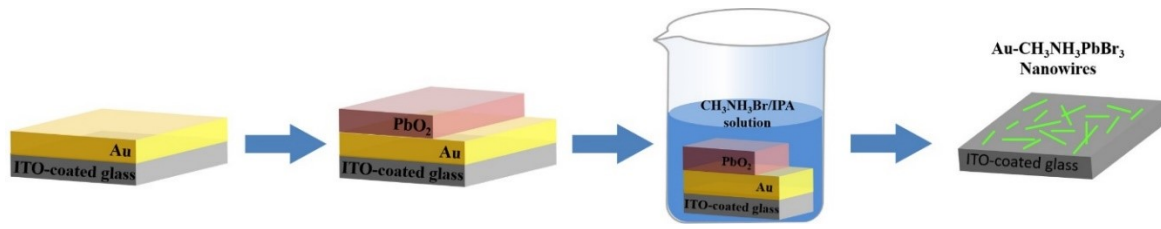

**Fig. S1.** Synthesis process of Au-CH<sub>3</sub>NH<sub>3</sub>PbBr<sub>3</sub> nanowires. The Au films and the PbO<sub>2</sub> films were deposited on the ITO glass substrates by a clever design, and reacted with 0.2 mg mL<sup>-1</sup>~10 mg mL<sup>-1</sup> CH<sub>3</sub>NH<sub>3</sub>Br isopropyl alcohol solutions for 10 min ~ 4 h to obtain the Au-CH<sub>3</sub>NH<sub>3</sub>PbBr<sub>3</sub> nanowires.

The as-grown Au-CH<sub>3</sub>NH<sub>3</sub>PbBr<sub>3</sub> nanowires were synthesized by a modified solution method,<sup>1</sup> as Fig. S1 schematically illustrated. First, the gold thin film was deposited on the ITO-coated glass substrate by the evaporation method. Then, the as-grown gold thin film was partially covered with the PbO<sub>2</sub> film prepared by the electrochemical deposition. The tentatively exposed gold film could participate in the reaction for the growth of Au-CH<sub>3</sub>NH<sub>3</sub>PbBr<sub>3</sub> nanowires.<sup>2</sup> Immersed in the CH<sub>3</sub>NH<sub>3</sub>Br isopropanol solution, the PbO<sub>2</sub> films were primarily converted to CH<sub>3</sub>NH<sub>3</sub>PbBr<sub>3</sub> nanowires as follows (Equations 1-3):<sup>3</sup>

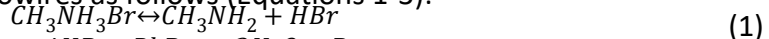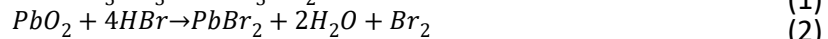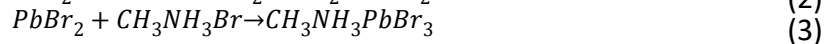

Initially, the CH<sub>3</sub>NH<sub>3</sub>Br decomposed to CH<sub>3</sub>NH<sub>2</sub> and HBr in the isopropanol solvent, which was a reversible reaction. Afterwards, the generated HBr reacted with the immersed PbO<sub>2</sub> quickly to form PbBr<sub>2</sub>, accompanied by the generation of H<sub>2</sub>O and Br<sub>2</sub>, and then the PbBr<sub>2</sub> continued to react with CH<sub>3</sub>NH<sub>3</sub>Br to synthesize CH<sub>3</sub>NH<sub>3</sub>PbBr<sub>3</sub>. As the reaction went on, plenty of intermediate products like HBr, Br<sub>2</sub> and H<sub>2</sub>O formed, which would assist the dissolution of the gold films as follows.

Because the bromide ions, not only act as strong ligand of Au<sup>+</sup> and Au<sup>3+</sup>, but also possess high oxidation potential under acidic condition, the dissolution mechanism of gold by bromide can be discussed from two aspects.<sup>2</sup> Firstly, the gold could be oxidized by bromide ions to AuBr<sub>2</sub><sup>-</sup> (Equation 4). While the AuBr<sub>2</sub><sup>-</sup> is unstable, and then disproportionates to stable AuBr<sub>4</sub><sup>-</sup> and Au (Equations 5). This process can be represented by the reactions as:<sup>4</sup>

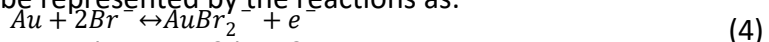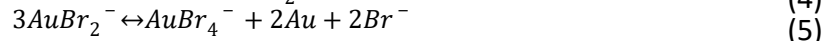

Secondly, the gold could be oxidized to AuBr<sub>4</sub><sup>-</sup> directly, which could be represented by the reaction (Equations 6):<sup>5</sup>

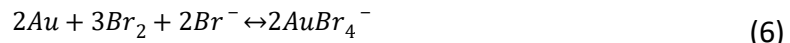

The Br<sub>2</sub> can be hydrolyzed to form the hypobromous acid. And then the gold is oxidized by the hypobromous acid. Thus the Equation 6 can be described by the following detailed reactions (Equations 7-8),<sup>6</sup> where the gold is oxidized by the Br<sub>2</sub> and complexed by bromide ions.

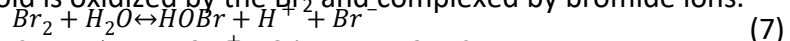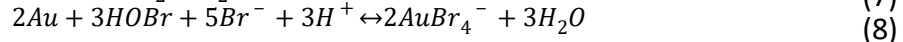

Assisted by the intermediate products from the growth process of CH<sub>3</sub>NH<sub>3</sub>PbBr<sub>3</sub>, the dissolution of gold occurs after the synthesis of CH<sub>3</sub>NH<sub>3</sub>PbBr<sub>3</sub> nanowires. Then we can introduce gold to the surface of CH<sub>3</sub>NH<sub>3</sub>PbBr<sub>3</sub> nanowires, since the bromide ions on the surface of CH<sub>3</sub>NH<sub>3</sub>PbBr<sub>3</sub> nanowires could complex with gold ions. All these chemical reactions about the dissolution of gold are reversible in the solution, causing the co-existence of AuBr<sub>2</sub><sup>-</sup>, AuBr<sub>4</sub><sup>-</sup> and Au on the surface of Au-CH<sub>3</sub>NH<sub>3</sub>PbBr<sub>3</sub> nanowires.

After the Au/PbO<sub>2</sub> films reacted with CH<sub>3</sub>NH<sub>3</sub>Br isopropanol solution for 2-4 hours, the as-grown samples were put on a hot plate at 50 °C for 5 min, which made the gold complex turn into stable form of Au. Compared with perovskite grown on the ITO-coated glass without gold films in our previous work, the optimal reaction time changes from 4 hours to 2 hours, which proves that the consumption of the intermediate products accelerates the reaction process.<sup>7</sup> Ultimately, we obtained the CH<sub>3</sub>NH<sub>3</sub>PbBr<sub>3</sub> nanowires encapsulated by the gold thin layers, defined as Au-CH<sub>3</sub>NH<sub>3</sub>PbBr<sub>3</sub> nanowires. Specifically, the metallic cavity nanolasers in this work are based on the Au-CH<sub>3</sub>NH<sub>3</sub>PbBr<sub>3</sub> nanowires with five surfaces coated by gold films, because

the transfer process would strip the as-grown nanowires away from the ITO-coated glass to the SiO<sub>2</sub> substrate, causing one side broken off.

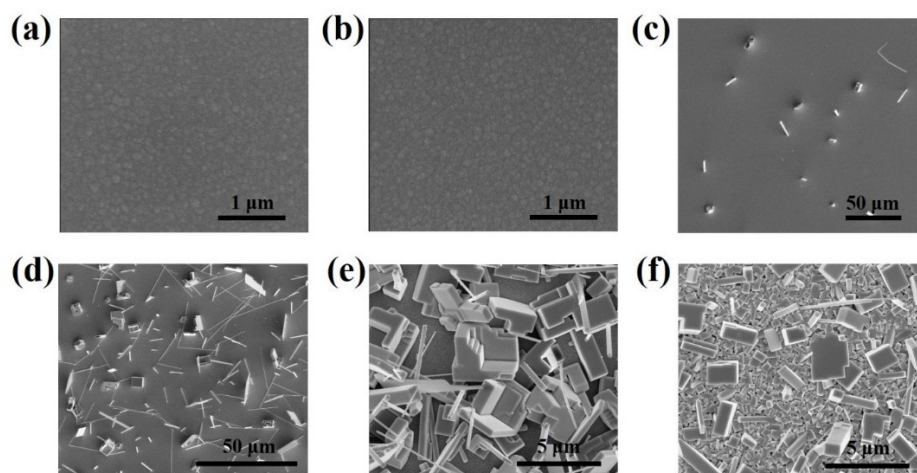

**Fig. S2.** The SEM images of Au-CH<sub>3</sub>NH<sub>3</sub>PbBr<sub>3</sub> nanowires grown at various concentrations of CH<sub>3</sub>NH<sub>3</sub>Br isopropyl alcohol solutions. (a) 0.2 mg mL<sup>-1</sup>, (b) 0.5 mg mL<sup>-1</sup>, (c) 1 mg mL<sup>-1</sup>, (d) 2 mg mL<sup>-1</sup>, (e) 5 mg mL<sup>-1</sup>, (f) 10 mg mL<sup>-1</sup>.

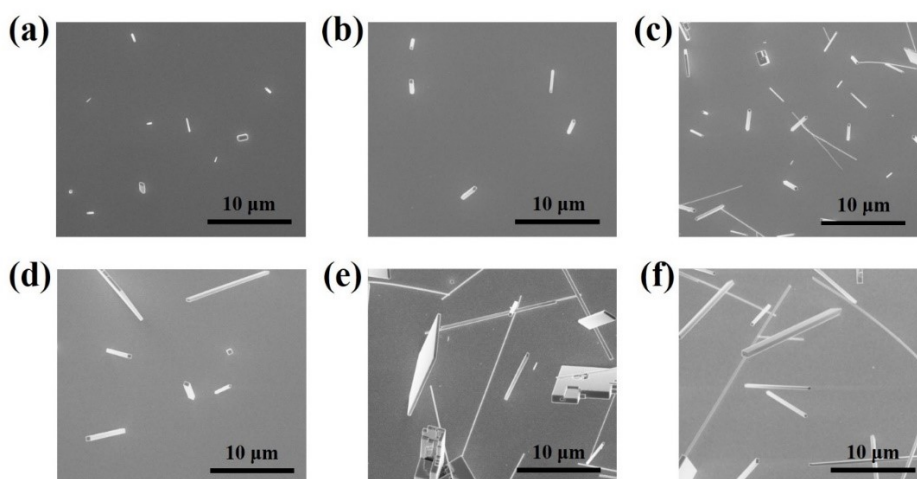

**Fig. S3.** The SEM images of Au-CH<sub>3</sub>NH<sub>3</sub>PbBr<sub>3</sub> nanowires grown at 2 mg mL<sup>-1</sup> CH<sub>3</sub>NH<sub>3</sub>Br isopropyl alcohol solutions for various reaction time. (a) 10 min, (b) 30 min, (c) 1 h, (d) 2 h, (e) 3 h, (f) 4 h.

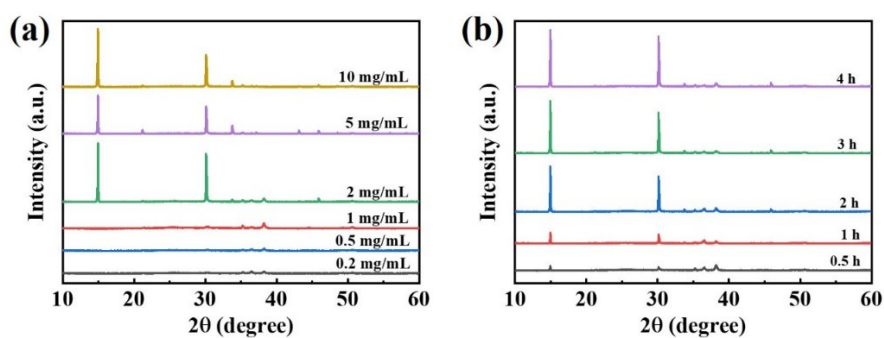

**Fig. S4.** The XRD patterns of Au-CH<sub>3</sub>NH<sub>3</sub>PbBr<sub>3</sub> nanowires grown at (a) various concentrations of CH<sub>3</sub>NH<sub>3</sub>Br isopropyl alcohol solutions and (b) various reaction times.

## Section 2: The numerical and experimental results of the devices.

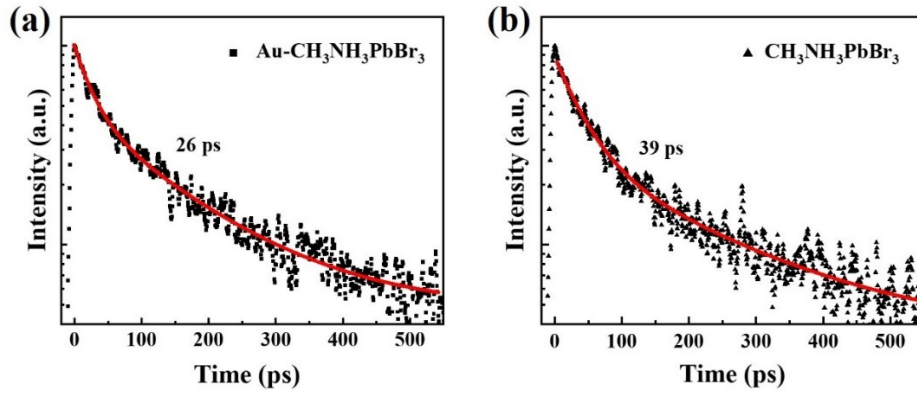

**Fig. S5.** The time-resolved photoluminescence decay (TRPL) of the (a) Au-CH<sub>3</sub>NH<sub>3</sub>PbBr<sub>3</sub> nanolasers and (b) CH<sub>3</sub>NH<sub>3</sub>PbBr<sub>3</sub> nanolasers at high excitation density (1 P<sub>th</sub>).

|                      | Material                                             | $\tau_1$<br>( $\phi_1$ ) | $\tau_2$<br>( $\phi_2$ ) | $\tau_{ave}$ |
|----------------------|------------------------------------------------------|--------------------------|--------------------------|--------------|
| Spontaneous Emission | Au-CH <sub>3</sub> NH <sub>3</sub> PbBr <sub>3</sub> | 1.06 ns<br>(72.81%)      | 6.13 ns<br>(27.19%)      | 2.44 ns      |
|                      | CH <sub>3</sub> NH <sub>3</sub> PbBr <sub>3</sub>    | 6.13 ns<br>(41.99%)      | 10.98 ns<br>(58.01%)     | 8.94 ns      |
| Stimulated Emission  | Au-CH <sub>3</sub> NH <sub>3</sub> PbBr <sub>3</sub> | 26 ps<br>(99.98%)        | 145 ps<br>(0.02%)        | 26 ps        |
|                      | CH <sub>3</sub> NH <sub>3</sub> PbBr <sub>3</sub>    | 39 ps<br>(98.20%)        | 200 ps<br>(1.80%)        | 42 ps        |

**Table S1.** The TRPL fitting parameters at the spontaneous emission and the stimulated emission. The

biexponential decay curves are fitting by  $I(t) = A_1 \exp\left(-\frac{t}{\tau_1}\right) + A_2 \exp\left(-\frac{t}{\tau_2}\right)$ , where  $\tau_1$  and  $\tau_2$  are the first lifetime and the second lifetime. The  $\phi_1$  and  $\phi_2$  are the proportion of the  $\tau_1$  and  $\tau_2$ , defined as  $\phi_1 = \frac{A_1 \tau_1}{A_1 \tau_1 + A_2 \tau_2}$  and  $\phi_2 = \frac{A_2 \tau_2}{A_1 \tau_1 + A_2 \tau_2}$ . The  $\tau_{ave}$  is the average lifetime calculated by  $\tau_{ave} = \tau_1 \phi_1 + \tau_2 \phi_2$ .

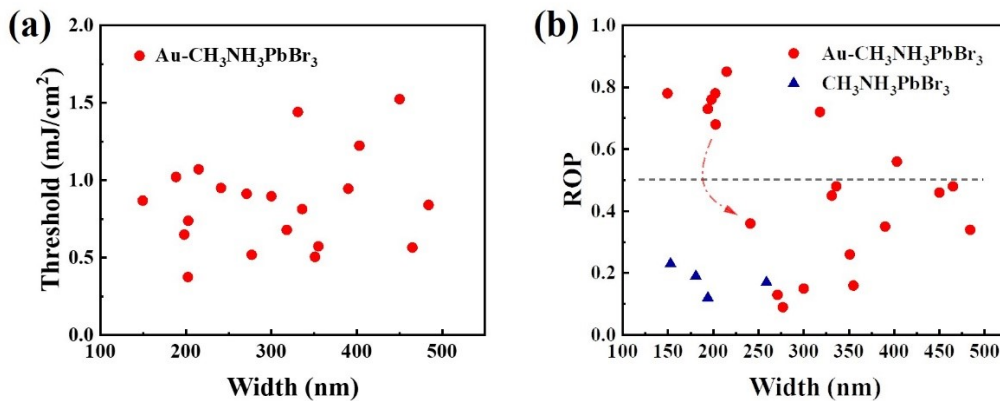

**Fig. S6.** The (a) threshold and (b) ROP value against the width of the nanowires.

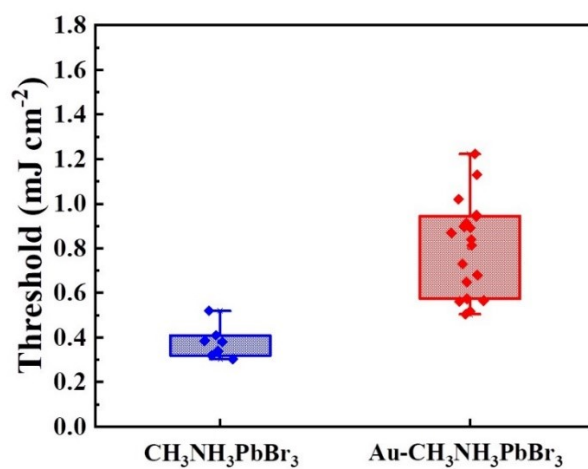

**Fig. S7.** The box chart of threshold of the CH<sub>3</sub>NH<sub>3</sub>PbBr<sub>3</sub> nanolasers and Au-CH<sub>3</sub>NH<sub>3</sub>PbBr<sub>3</sub> nanolasers.

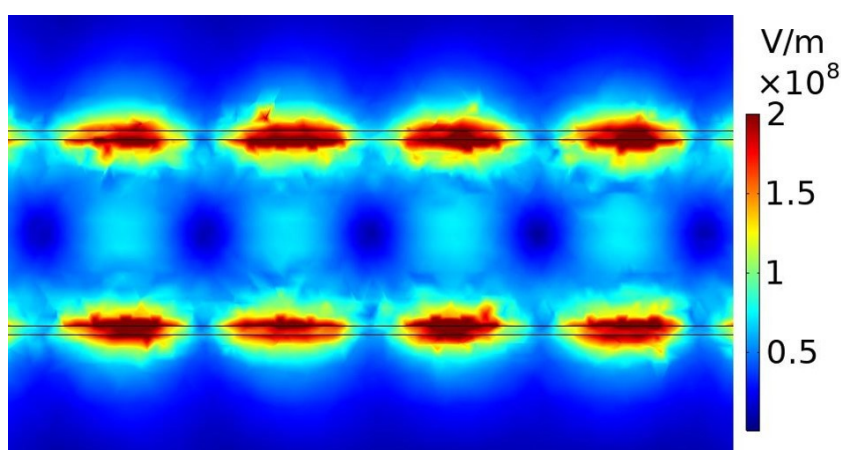

**Fig. S8.** Top-view calculated electric field distribution of Au-CH<sub>3</sub>NH<sub>3</sub>PbBr<sub>3</sub> nanolasers at the interface of Au shell and CH<sub>3</sub>NH<sub>3</sub>PbBr<sub>3</sub>.

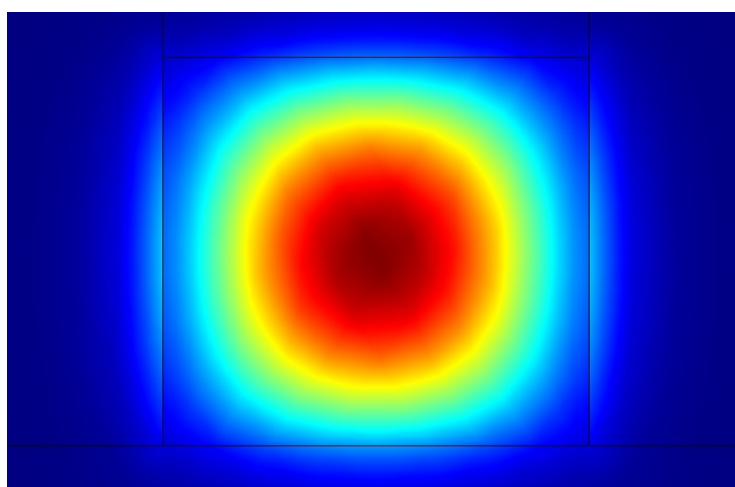

**Fig. S9.** Calculated electric field distribution of CH<sub>3</sub>NH<sub>3</sub>PbBr<sub>3</sub> nanolasers with nanowire width of 500 nm.

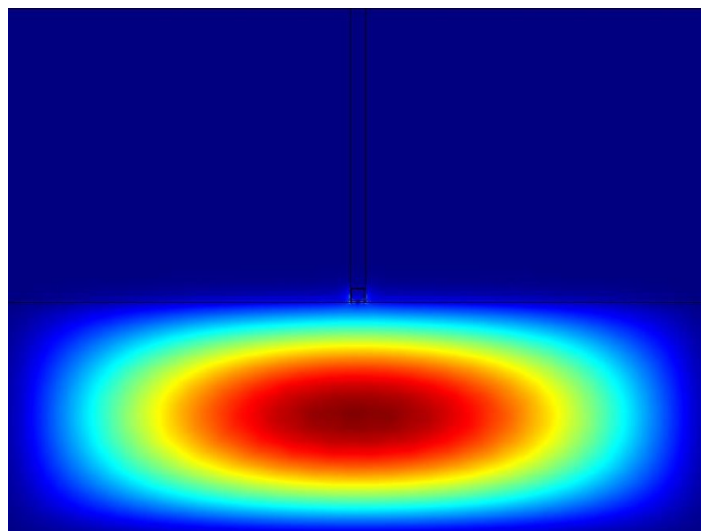

**Fig. S10.** Calculated electric field distribution of Au-CH<sub>3</sub>NH<sub>3</sub>PbBr<sub>3</sub> nanolasers with nanowire width of 100 nm.

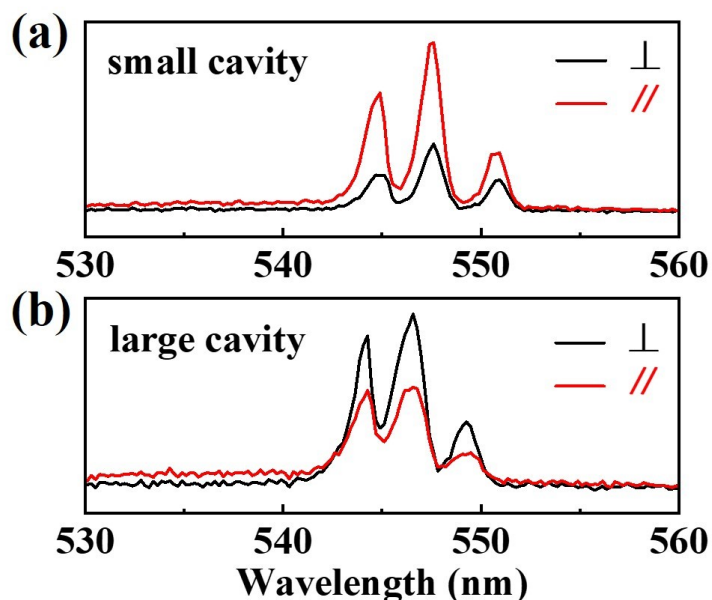

**Fig. S11.** The polarization property of Au-CH<sub>3</sub>NH<sub>3</sub>PbBr<sub>3</sub> nanolasers with small size (150 nm) and large size (400 nm).

1. K. Ren, J. Wang, S. Chen, Q. Yang, J. Tian, H. Yu, M. Sun, X. Zhu, S. Yue, Y. Sun, K. Liu, M. Azam, Z. Wang, P. Jin, S. Qu and Z. Wang, *Laser Photonics Rev.*, 2019, **13**, 1800306.
2. R. Sousa, A. Futuro, A. Fiúza, M. C. Vila and M. L. Dinis, *Minerals Engineering*, 2018, **118**, 16-23.
3. J. H. Huang, K. J. Jiang, X. P. Cui, Q. Q. Zhang, M. Gao, M. J. Su, L. M. Yang and Y. Song, *Sci. Rep.*, 2015, **5**, 15889.
4. B. PESIC and R. H. SERGENT, *Metall Mater. Trans. B*, 1993, **24B**, 419-431.
5. R. B. E. Trindade, P. C. P. Rocha and J. P. Barbosa, *Dissolution of gold in oxidized bromide solutions*, Springer Netherlands, 1994.
6. H. A. Liebhafsky, *J. Am. Chem. Soc.*, 1934, **56**, 1500-1505.
7. K. Ren, J. Wang, K. Liu, Y. Huang, Y. Sun, M. Azam, P. Jin, Z. Wang, S. Qu and Z. Wang, *RSC Advances*, 2019, **9**, 19772-19779.
